# Supplementary material for: Complications, Adverse Drug Events, High Costs, and Disparities in Multisystem Inflammatory Syndrome in Children vs COVID-19
Source: PubMed Central journal article supplement (PMC9857408; doi:10.1001/jamanetworkopen.2022.44975), 2023-01-05
Supplement: jamanetwopen-e2244975-s002.pdf [file jamanetwopen-e2244975-s002.pdf]

## Data Sharing Statement

Encinosa. Complications, Adverse Drug Events, High Costs, and Disparities in Multisystem Inflammatory Syndrome in Children vs COVID-19. *JAMA Netw Open*. Published January 05, 2023. doi:10.1001/jamanetworkopen.2022.44975

### Data

**Data available:** No

### Additional Information

**Explanation for why data not available:** The data used for this study were internal federal data from the AHRQ's Healthcare Cost and Utilization Project (HCUP). Publicly available data also are available through the HCUP Central Distributor: [www.hcup-us.ahrq.gov/tech\\_assist/centdist.jsp](http://www.hcup-us.ahrq.gov/tech_assist/centdist.jsp).
